# Supplementary material
Source: PubMed Central journal article supplement (PMC3724656)
Supplement: supp_M113.468108_Supplements.pdf [file supp_M113.468108_Supplements.pdf]

## SUPPLEMENTAL MATERIALS

**Table S1. Binding of LDLR fragments to RAP**<sup>1,2</sup>

| LDLR fragment  | $k_a$ (1/M × s)    | $k_d$ (1/s)           | $K_D$ (nM) | $\text{Chi}^2$ | $R_{\text{max}}$ (RU) |
|----------------|--------------------|-----------------------|------------|----------------|-----------------------|
| LDLR-exodomain | $7.56 \times 10^6$ | $6.47 \times 10^{-3}$ | 0.87       | 32.0           | 193                   |
| LDLR cluster   | $3.62 \times 10^6$ | $3.45 \times 10^{-3}$ | 0.95       | 21.4           | 135                   |
| CR.2-3         | $1.01 \times 10^5$ | $2.93 \times 10^{-3}$ | 28.9       | 24.9           | 412                   |
| CR.3-4         | $1.42 \times 10^6$ | $4.95 \times 10^{-3}$ | 3.48       | 26.4           | 248                   |
| CR.4-5         | $7.26 \times 10^5$ | $4.68 \times 10^{-3}$ | 6.44       | 24.8           | 173                   |

<sup>1</sup> Corresponds to experiment shown in Fig. 3

<sup>2</sup> Association and dissociation signals were fitted with a 1:1 (Langmuir) model

**Table S2. Binding of LDLR fragments to FVIII**<sup>1,2</sup>

| LDLR fragment  | $k_a$ (1/M × s)    | $k_d$ (1/s)           | $K_D$ (nM) | $\text{Chi}^2$ | $R_{\text{max}}$ (RU) |
|----------------|--------------------|-----------------------|------------|----------------|-----------------------|
| LDLR-exodomain | $1.83 \times 10^4$ | $1.24 \times 10^{-3}$ | 67.9       | 9.56           | 139                   |
| LDLR cluster   | $4.41 \times 10^4$ | $1.43 \times 10^{-3}$ | 32.5       | 13.4           | 122                   |
| CR.2-3         | $5.16 \times 10^4$ | $2.10 \times 10^{-3}$ | 40.7       | 15.6           | 79.9                  |
| CR.3-4         | $2.71 \times 10^4$ | $2.36 \times 10^{-3}$ | 87.2       | 12.6           | 112                   |
| CR.4-5         | $3.59 \times 10^4$ | $2.66 \times 10^{-3}$ | 74.0       | 26.4           | 153                   |

<sup>1</sup> Corresponds to experiment shown in Fig. 4

<sup>2</sup> Association and dissociation signals were fitted with a 1:1 (Langmuir) model

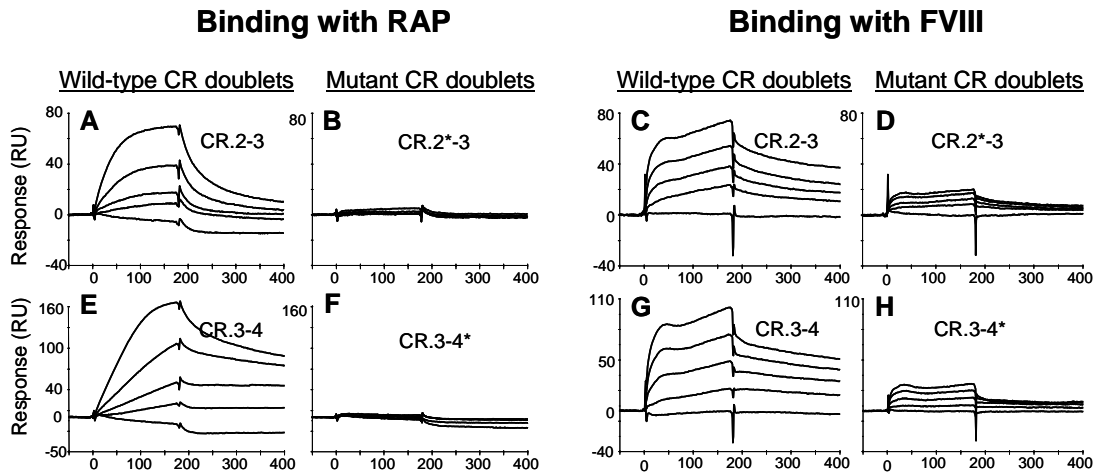

FIGURE S1. **Binding of RAP and FVIII to the mutants of CR.2-3 and CR.3-4.** In SPR, CR.2-3 (A and C), CR.2-3 W66S (B and D), CR.3-4 (E and G) and CR.3-4 W144S (F and H) were immobilized and tested for the binding with RAP (0.6 nM, 1.3 nM, 2.5 nM, and 5 nM) (A, B, E and F) and FVIII (full-size recombinant FVIII, 50 nM, 100 nM, 150 nM and 200 nM) (C, D, G and H); injections of the buffer only were used as controls. For each pair of a particular LDLR fragment and its mutant tested versus a given ligand, the signals are shown in the same scale. (\*) CR domains affected by mutagenesis.

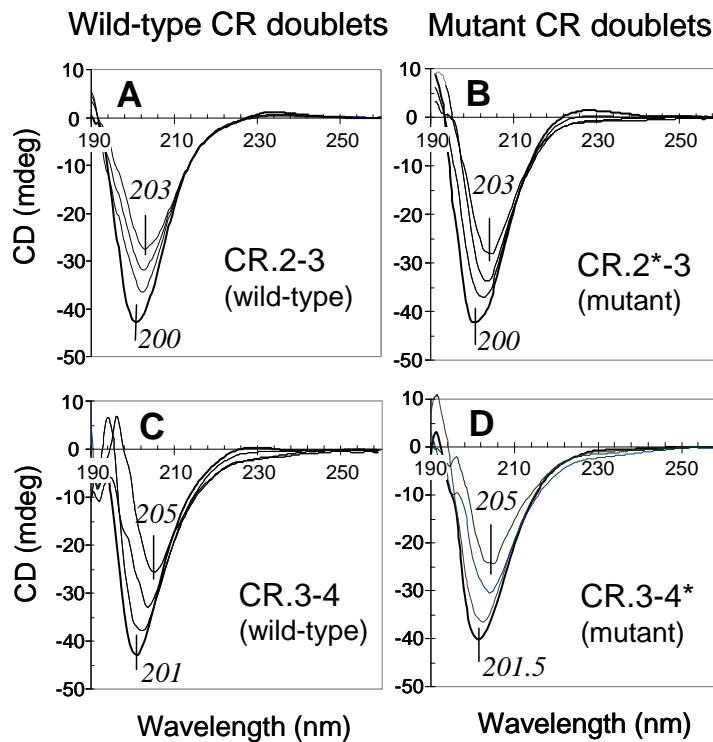

FIGURE S2. **Far-UV CD spectra of CR.2-3 and CR.3-4 and their mutants upon the titration by EDTA.** The CR doublets, CR.2-3 (A) and CR.3-4 (C) and their mutants, CR.2-3 W66S (B) and CR.3-4 W144S (D) were at concentrations of 30  $\mu$ M. The spectra correspond to the absence of EDTA (bottom curves in bold) and its increase as 1x, 2x and 3x over molar equivalent of  $\text{Ca}^{2+}$  in the solutions, shown as respective increase in the signals (upper curves).
